# Supplementary material for: Interaction between polygenic risk for cigarette use and environmental exposures in the Detroit neighborhood health study
Source: PubMed Central journal article supplement — Transl Psychiatry. 2013 Aug 13;3(8):e290–. doi: 10.1038/tp.2013.63 (PMC3756291; doi:10.1038/tp.2013.63), 2013-08-13

Supplementary Figure 2. The Distribution of Genetic Risk Scores in the Detroit Neighborhood Health Sample

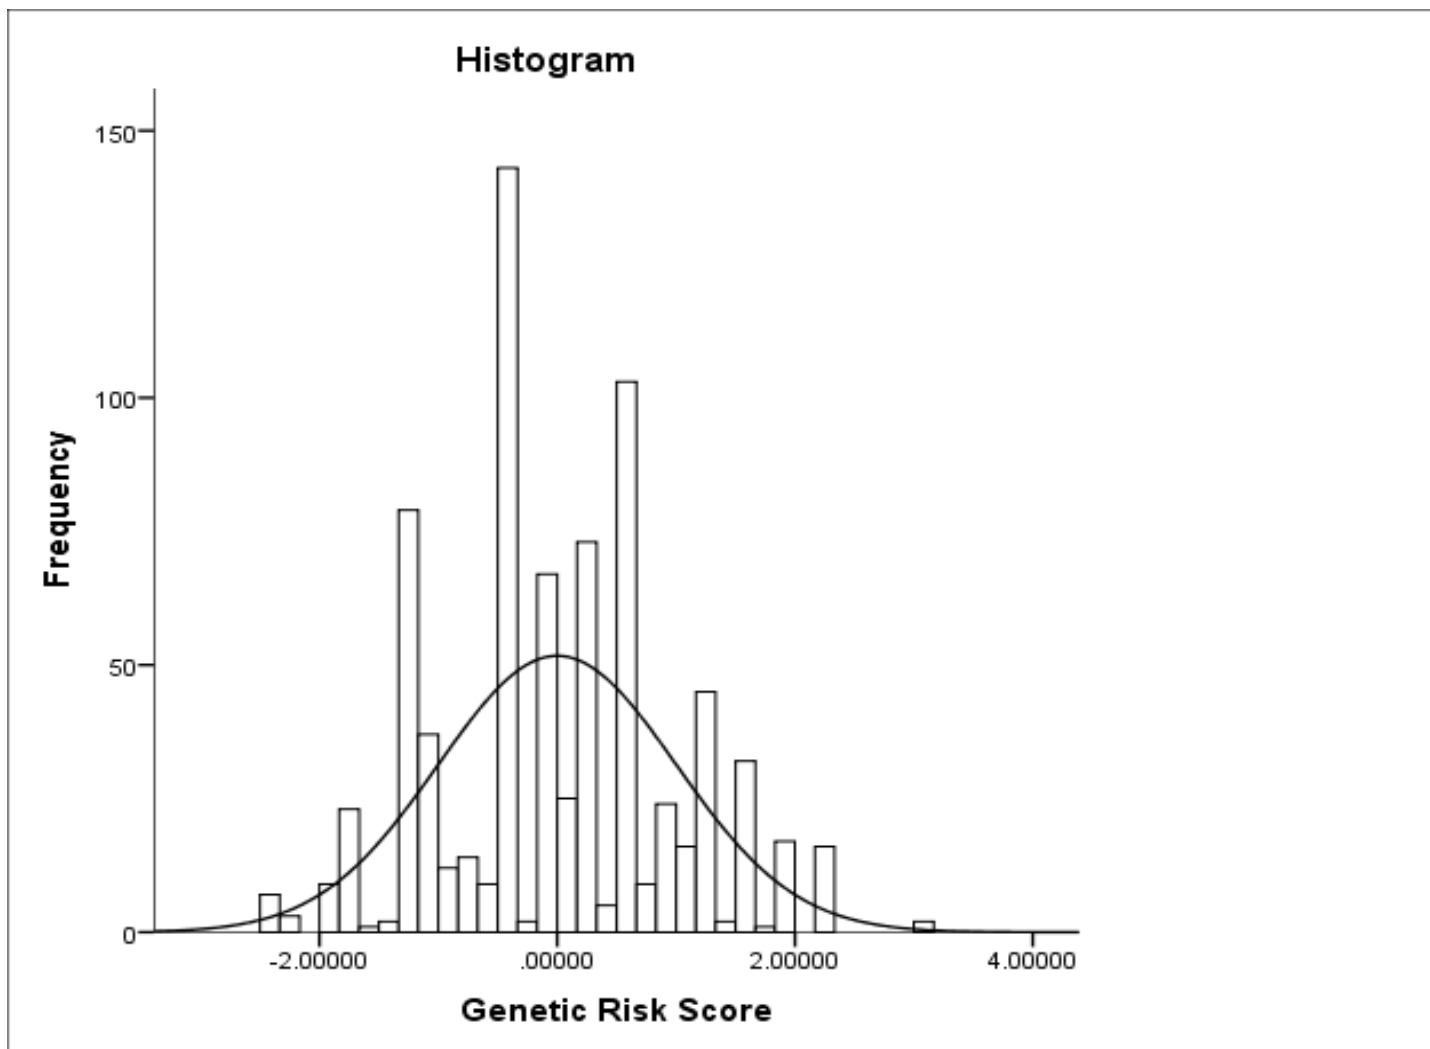

Supplement: tp201363x2.pdf [file tp201363x2.pdf]
